# Supplementary material for: 3D Polymer Architectures for the Identification of Optimal Dimensions for Cellular Growth of 3D Cellular Models
Source: MDPI journal article supplement (doi:10.3390/polym14194168), 2022-10-04
Supplement: s1 [file s1]

## Matlab code for cell tracking.

```
% ***** user parameters *****
loadFiles = true;      % true / false to load new files
trackCells = true;     % true / false to track cell positions
showCells = true;      % true / false to show the cell positions

N = 5;                 % +/- pixel window size
Ntmin = 4;             % min number of time bins per cell
Ntmax = 6;             % max number of time bins per cell
discardFoundPoints = true; % discard cell positions once a cell is found
discardControl = true; % true / false to discard control cells from
analysis
ctrlY = 100;           % y position of the controll scaffold (to discard)

showDisplacementMap = true; % true / false show displacement map
dmax = 30;             % maximum displacement (color limit)

% ***** end of user paramets *****

discardFoundPoints = logical(discardFoundPoints + (Ntmin ~= Ntmax)); %
force true if Ntmin ~= Ntmax

if loadFiles
    [FileName,PathName] = uigetfile('*.png','MultiSelect','on'); % file
    name and dir
    ims = []; % image stack matrix
    for ii = 1 : length(FileName); % iterate over selected
    files
        ims = cat(3,ims,imread([PathName, '\',FileName{ii}])); %
    concatenate loaded files
    end
    ims = double(ims); % convert matrix to double
end

figure('color','w') % create a new white figure
scaff = (175 < ims(:,:,3)).*(ims(:,:,3) < 185); % find scaffolds in image
cells_raw = ims(:,:,2:3:end) == 160; % find cells in images
if discardControl
    cells = cells_raw; cells(1:ctrlY,:,:) = 0; % discard control cells
from analysis
end

[fsy,fsx] = find(scaff); % find the scaffold point
plot(fsx,fsy,'.k'); axis image; % show the scaffold
set(gca,'ydir','reverse'); % show the image in the
typical direction
%imagesc(scaff); axis image; colormap(flipud(gray)) % show the scaffold
hold on

if trackCells
    ds = []; % array of cell
    displacements
    dmap = nan(size(cells,1),size(cells,2)); % map of cell displacements
    for nt = Ntmax:-1:Ntmin % iterate over min number
    of time bins / cell
        for ii = N+1 : (size(cells,1) - N) % iterate over y
            for jj = N+1 : (size(cells,2) - N) % iterate over x
                subcells = cells(ii-N : ii+N , jj-N : jj+N,:); % find
[2N+1,2N+1] window
                if sum(subcells(:)) == nt % number of points matches
the time bin requirements
                    xs = zeros(1,nt); % x array of cell positions
```

```

ys = xs; % y array of cell positions
nCells = 0; % number of cells per time

slice
    fail = false; % in case no cell is found
    for kk = 1 : nt % iterate over the time
        slices
            [ya,xa] = find(subcells(:,:,kk)); % find cell
        positions
            nCells = max(nCells,length(xa)); % count number
        of cells per slice
        if (nCells == 1) && ~isempty(xa) % if only 1 cell
            per slice
                trajectory
                    try
                        xs(kk) = xa + jj - N - 1; % store cell
                        trajectory
                            ys(kk) = ya + ii - N - 1; % store cell
                            catch
                                fail = true; % in case no cell is found
                            end
                        else
                            fail = true;
                        end
                    end
                only one cell is found
                if (nCells == 1) && ~isempty(xa) && ~fail % one and
                    displacement
                        d = sum(sqrt(diff(xs).^2 + diff(ys).^2)); % total
                    array
                        ds(end+1) = d; % store in displacements
                    store in displacement mp
                        dmap(round(mean(ys)),round(mean(xs))) = d; %
                plot the cell trajectory
                    plot(xs,ys,'linewidth',2,'color',rand(1,3)) %
                    if discardFoundPoints
                        discard already counted cells
                            cells(ii-N : ii+N , jj-N : jj+N,:) = 0; %
                        end
                    end
                end
            end
        end
    end
end

if showCells
    cmap = jet(size(cells,3)); % assign different colors
to the time bins
    for ii = 1 : size(cells,3)
        each time bin
            [y,x] = find(cells_raw(:,:,ii)); % find the cells in
            plot(x,y,'o','color',cmap(ii,:), 'linewidth',2) % show the cells
        end
    end
end

if showDisplacementMap
    c = imagesc(inpaint_nans(dmap,5));
    uistack(c, 'bottom');
    colormap(jet(255))
    caxis([0 dmax])
end

```
